# Supplementary material
Source: publisher figshare collection journal article supplement (https://gsajournals.figshare.com/ndownloader/files/13021511)
Supplement: Supplementary file 1 [file 13021511]

## Sheet: Sheet1
segregant lable	mutation rate score
A02_01	-0.691455
A02_02	0.2821
A02_03	-0.491769
A02_04	-0.353599
A02_05	-0.489128
A02_06	-0.37442
A02_07	0.165369
A02_08	-0.478681
A02_09	0.729158
A02_10	0.22659
A02_11	-0.0303456
A02_12	-0.232
A02_13	-1.06238
A02_14	-0.767897
A02_15	-0.359798
A02_16	-0.0285951
A02_17	-0.627921
A02_18	-0.910784
A02_19	-0.353175
A02_20	-0.174474
A02_21	0.983484
A02_22	-0.388111
A02_23	0.809501
A02_24	1.24523
A02_26	3.75129
A02_27	0.530416
A02_29	0.37051
A02_30	0.204948
A02_32	-0.227756
A02_33	-0.294835
A02_34	-0.624575
A02_35	-0.745142
A02_36	1.07936
A02_37	-0.864455
A02_38	-1.06254
A02_39	-0.517114
A02_40	-0.633192
A02_41	0.246316
A02_43	-0.78468
A02_44	-0.257286
A02_45	-0.527745
A02_46	0.365596
A02_47	-0.565814
A02_48	-0.5143
A02_49	0.166468
A02_50	-0.810513
A02_51	0.454386
A02_52	0.463658
A02_53	-0.702705
A02_54	2.29341
A02_55	0.940507
A02_56	-0.981254
A02_57	0.14257
A02_58	-0.420815
A02_59	-0.318087
A02_60	-0.116628
A02_61	-0.55242
A02_62	-0.253873
A02_63	-0.0413372
A02_64	-0.796363
A02_66	0.464646
A02_67	1.5392
A02_68	-0.815461
A02_69	-0.347973
A02_70	1.2589
A02_71	-0.425252
A02_72	-0.341488
A02_73	0.549229
A02_74	2.32258
A02_75	-0.139352
A02_76	-0.0126558
A02_78	0.228474
A02_79	0.390898
A02_80	-0.184229
A02_81	0.859027
A02_82	-0.326598
A02_83	0.38131
A02_84	-0.282485
A02_85	-0.426043
A02_86	1.18295
A02_87	0.674738
A02_88	-0.101765
A02_89	0.282522
A02_90	0.565491
A02_91	-0.558924
A02_92	-0.0438991
A02_93	-0.189101
A02_94	-0.18734
A02_95	0.203748
A02_96	-0.76644
A03_01	-0.329333
A03_02	-0.268432
A03_03	0.602173
A03_04	-1.16496
A03_05	0.363964
A03_06	-0.556319
A03_07	0.59898
A03_08	-1.04588
A03_09	-0.148618
A03_10	-1.04203
A03_11	0.241305
A03_12	-1.10134
A03_13	1.22784
A03_14	0.20643
A03_15	0.144357
A03_16	4.71466
A03_17	-1.03595
A03_18	-0.820945
A03_19	0.15689
A03_20	0.609696
A03_21	-0.296745
A03_22	0.345913
A03_23	-0.888138
A03_24	-0.557699
A03_25	-1.53528
A03_26	0.502991
A03_27	-0.691222
A03_28	0.926562
A03_29	1.73868
A03_30	0.244084
A03_31	-0.415689
A03_32	0.226177
A03_33	-0.145845
A03_34	0.211378
A03_35	0.698552
A03_36	-1.5702
A03_37	-1.47212
A03_38	0.372235
A03_39	-0.824873
A03_40	-0.256223
A03_41	0.725518
A03_42	-1.47478
A03_43	-1.18368
A03_44	-0.358222
A03_45	-0.984273
A03_46	-0.335672
A03_47	-1.00683
A03_48	-1.41917
A03_49	0.817205
A03_50	-0.747315
A03_51	-1.5268
A03_52	-0.904738
A03_53	-0.0139637
A03_54	-0.452597
A03_55	1.77917
A03_56	-0.982028
A03_57	0.412076
A03_58	-0.526856
A03_59	-0.943781
A03_60	-0.329307
A03_61	1.06824
A03_62	1.68665
A03_63	-0.275353
A03_64	0.457961
A03_65	0.976124
A03_66	1.456
A03_67	1.79912
A03_68	0.00793725
A03_69	3.71628
A03_70	0.0383371
A03_71	0.508372
A03_72	2.25373
A03_73	-0.564715
A03_75	-0.820896
A03_76	0.929281
A03_77	-0.811487
A03_78	-1.46151
A03_79	-0.270301
A03_80	-0.784803
A03_81	0.36012
A03_82	0.594195
A03_83	-1.00356
A03_84	0.249911
A03_85	0.0865967
A03_86	1.22195
A03_87	0.108762
A03_88	-1.28532
A03_89	2.54816
A03_90	-1.41487
A03_91	0.232941
A03_92	0.0285992
A03_93	0.729531
A03_94	0.0119304
A03_95	-0.837311
A04_01	-1.73236
A04_02	0.969456
A04_03	2.2773
A04_04	1.66117
A04_05	1.19422
A04_06	-1.76674
A04_07	-1.6999
A04_08	-0.0704735
A04_09	2.28147
A04_10	0.526391
A04_11	0.570313
A04_12	-0.592249
A04_13	-0.290402
A04_15	0.170855
A04_16	-1.97826
A04_17	-0.943367
A04_18	1.09803
A04_19	2.31979
A04_20	0.503586
A04_21	1.07861
A04_22	-0.399344
A04_23	0.407097
A04_24	-1.67308
A04_25	2.04272
A04_26	0.631898
A04_27	4.08451
A04_28	-0.652223
A04_29	1.46804
A04_30	-1.1163
A04_31	-0.572471
A04_32	-0.366633
A04_33	1.32264
A04_34	-1.87616
A04_35	0.270456
A04_36	2.52689
A04_37	-0.518689
A04_38	-1.11567
A04_39	-0.754758
A04_40	-0.825301
A04_41	-0.837708
A04_42	-1.58116
A04_43	-0.751762
A04_44	-0.471641
A04_45	-0.281254
A04_46	-2.03678
A04_47	-0.571085
A04_48	-0.564431
A04_49	-2.01401
A04_50	-0.817893
A04_51	-0.947571
A04_52	1.42371
A04_53	-1.01623
A04_54	0.111575
A04_55	0.411901
A04_56	-0.559385
A04_57	2.76285
A04_58	0.446552
A04_59	-1.5158
A04_60	-1.12848
A04_61	-0.919699
A04_62	2.59624
A04_63	-1.54913
A04_64	-0.192833
A04_65	-0.782303
A04_66	-1.02773
A04_67	0.291186
A04_68	0.214573
A04_69	1.45855
A04_70	0.193237
A04_71	0.10618
A04_72	0.988167
A04_73	-2.07773
A04_74	3.92881
A04_75	1.09426
A04_76	-0.0440288
A04_77	-0.288155
A04_78	1.18915
A04_79	1.46247
A04_80	-0.0149955
A04_81	-2.18157
A04_82	1.42258
A04_84	1.22755
A04_85	-0.137949
A04_86	-1.25562
A04_87	0.708176
A04_88	-0.0505439
A04_89	-0.920063
A04_90	-0.97009
A04_91	0.292951
A04_92	0.167582
A04_93	-0.855601
A04_94	2.00446
A04_95	0.887069
A04_96	-2.31075
A06_01	-1.37868
A06_02	-0.231449
A06_03	0.408373
A06_04	-0.881097
A06_05	0.499852
A06_06	-0.414707
A06_07	2.31918
A06_08	-1.30617
A06_09	-0.176846
A06_10	-0.185485
A06_11	-0.462703
A06_12	-0.0701652
A06_13	-0.595706
A06_14	1.07933
A06_15	-0.0180283
A06_16	-0.482246
A06_17	-0.508698
A06_18	-0.870886
A06_19	0.0804069
A06_20	-1.47568
A06_21	1.08337
A06_22	-0.426953
A06_23	0.34688
A06_24	-0.203345
A06_25	-0.547906
A06_26	-0.940506
A06_27	3.47523
A06_28	-0.704316
A06_29	-0.0318158
A06_30	0.0118567
A06_31	3.84648
A06_32	-0.364149
A06_33	-0.0645352
A06_34	2.65344
A06_35	1.85449
A06_36	-0.0502613
A06_37	-0.303766
A06_38	0.294369
A06_39	1.71731
A06_40	0.592381
A06_41	-0.374663
A06_42	1.58328
A06_43	-1.57832
A06_44	0.187104
A06_45	-0.145999
A06_46	0.335251
A06_47	-0.577271
A06_48	-1.22288
A06_49	-0.218459
A06_50	-0.2637
A06_51	0.22938
A06_52	-1.27393
A06_53	-0.247193
A06_54	-1.11821
A06_55	1.94642
A06_56	-0.600657
A06_57	-0.21479
A06_58	-1.11538
A06_59	-0.760454
A06_60	-0.473489
A06_61	0.681159
A06_62	0.126708
A06_63	2.54577
A06_64	0.896442
A06_65	0.292753
A06_66	1.68264
A06_67	-0.114658
A06_68	-1.41135
A06_69	-0.726596
A06_70	-0.136966
A06_71	-1.09907
A06_72	-0.0153678
A06_73	-0.053765
A06_75	-0.891071
A06_76	0.185737
A06_77	-0.454801
A06_78	0.32913
A06_79	0.0827573
A06_80	-0.397259
A06_81	-1.52439
A06_82	-0.342577
A06_83	0.331706
A06_84	0.976623
A06_85	-0.0946565
A06_86	-0.720227
A06_87	0.23228
A06_88	0.689445
A06_89	3.14444
A06_90	-0.801133
A06_91	0.143661
A06_92	-0.696889
A06_93	-0.812611
A06_94	-0.336966
A06_95	-0.168379
A06_96	-0.991463
A07_01	3.87395
A07_02	-1.02301
A07_03	-0.699459
A07_04	-0.739783
A07_05	0.423044
A07_06	-1.36598
A07_07	-1.17053
A07_08	-0.779278
A07_09	1.59502
A07_10	-0.641192
A07_11	-1.0264
A07_12	-1.1127
A07_13	-0.536049
A07_14	-0.061753
A07_15	2.31611
A07_16	-1.23926
A07_17	0.962615
A07_18	-0.784502
A07_19	-0.851109
A07_20	-0.82974
A07_21	0.335738
A07_22	-0.725747
A07_23	0.665068
A07_24	-1.35071
A07_25	-0.888292
A07_26	4.52615
A07_27	-0.547905
A07_28	-0.874212
A07_29	-0.80752
A07_30	-1.3494
A07_31	-0.787041
A07_32	-0.737465
A07_33	0.142658
A07_34	1.92326
A07_35	-0.660077
A07_36	-0.0752363
A07_37	-0.396646
A07_38	-0.684898
A07_39	-1.26005
A07_40	1.03684
A07_41	0.269716
A07_42	-1.38324
A07_43	-0.32571
A07_44	-0.561372
A07_45	0.226029
A07_46	-0.452553
A07_47	-0.295726
A07_48	0.753026
A07_49	2.80501
A07_50	4.83833
A07_51	0.599972
A07_52	-0.642424
A07_53	0.131547
A07_54	-0.267996
A07_55	0.288618
A07_56	-0.314984
A07_57	0.370299
A07_58	-1.55208
A07_59	-0.2195
A07_61	0.149945
A07_62	-0.362782
A07_63	-0.723728
A07_64	-1.10927
A07_65	0.289466
A07_66	2.56117
A07_67	1.76437
A07_68	1.62308
A07_69	-1.13827
A07_70	2.66182
A07_73	0.372112
A07_74	0.481065
A07_75	2.58413
A07_76	-0.92106
A07_77	-0.210959
A07_78	0.884977
A07_79	0.874456
A07_80	-0.355297
A07_81	-0.405997
A07_82	-1.11924
A07_83	0.896499
A07_84	-0.809846
A07_85	-0.088258
A07_86	-0.840443
A07_87	0.184319
A07_88	-0.676058
A07_89	-0.826047
A07_90	-0.693811
A07_91	-0.982356
A07_92	-0.0997937
A07_93	1.10181
A07_94	-0.842484
A07_95	-0.93066
A07_96	-1.35431
A08_01	-1.35609
A08_02	1.82917
A08_03	-0.0550894
A08_04	-1.78792
A08_05	0.59241
A08_06	-2.078
A08_07	-0.655794
A08_08	0.0478293
A08_09	-1.82818
A08_10	0.465709
A08_11	-0.921987
A08_12	-1.09307
A08_13	-0.946759
A08_14	-1.05414
A08_17	-1.32406
A08_18	4.2567
A08_19	-0.53438
A08_20	-1.1775
A08_21	-1.02808
A08_22	-0.850565
A08_23	-0.154439
A08_24	-1.62285
A08_25	2.44751
A08_26	0.320468
A08_27	-0.771252
A08_28	3.98491
A08_29	1.38085
A08_30	0.0111864
A08_31	-1.92668
A08_32	2.09114
A08_33	-0.922581
A08_34	-0.390973
A08_35	-0.96027
A08_36	-1.16574
A08_37	2.4148
A08_38	0.760713
A08_39	1.87822
A08_40	-0.9711
A08_41	-1.83038
A08_42	-1.597
A08_43	0.832288
A08_44	-0.699121
A08_45	0.266488
A08_46	-1.45836
A08_47	0.270569
A08_48	0.091912
A08_49	-2.26689
A08_50	-0.410547
A08_51	-0.167917
A08_52	-1.80126
A08_53	-0.475332
A08_54	-1.77901
A08_55	-1.37938
A08_56	-1.17318
A08_57	0.496788
A08_58	-1.15956
A08_59	-0.946082
A08_60	0.840387
A08_61	-1.67013
A08_62	-0.36095
A08_63	-1.29995
A08_64	3.11693
A08_65	-1.4681
A08_66	-1.26114
A08_67	-0.84128
A08_68	1.73236
A08_69	-0.0193116
A08_70	-1.46192
A08_71	-0.418915
A08_72	0.573953
A08_73	0.111716
A08_74	5.92967
A08_75	1.00686
A08_76	-1.88663
A08_77	2.19133
A08_78	0.251052
A08_79	-0.598315
A08_80	1.26075
A08_81	1.29574
A08_82	1.6838
A08_83	-1.63114
A08_84	-1.92798
A08_85	0.721143
A08_86	-0.0856447
A08_87	2.9155
A08_88	5.82662
A08_89	-0.582001
A08_90	1.2403
A08_91	0.541855
A08_92	1.90536
A08_93	1.334
A08_94	-0.859204
A08_95	0.308253
A08_96	-0.133098
A09_01	0.138995
A09_02	-0.518241
A09_03	0.610678
A09_04	-1.39425
A09_05	-1.53678
A09_06	-1.29641
A09_07	-1.58952
A09_08	-0.765626
A09_09	-1.2279
A09_10	-1.55911
A09_11	-2.77353
A09_12	-0.0687067
A09_13	8.9814
A09_14	7.68022
A09_15	2.05913
A09_16	-0.451795
A09_17	-0.480912
A09_18	0.600725
A09_19	-0.448373
A09_20	-0.723195
A09_21	0.515546
A09_22	-0.0478311
A09_23	-0.982042
A09_24	-0.870497
A09_25	1.06415
A09_26	1.10749
A09_27	0.0519766
A09_28	-0.697196
A09_29	-1.83217
A09_30	-1.82415
A09_31	0.185106
A09_32	-0.330463
A09_33	0.939267
A09_34	1.15315
A09_35	2.70007
A09_36	-1.25593
A09_37	4.9905
A09_38	-0.0144506
A09_39	-1.96791
A09_40	1.83901
A09_41	4.22518
A09_42	0.621744
A09_43	-0.228613
A09_44	-1.49619
A09_45	-0.842698
A09_46	-0.778475
A09_47	-2.39823
A09_48	-0.970108
A09_49	-0.912657
A09_50	-0.670079
A09_51	1.01386
A09_52	-1.91654
A09_53	0.775114
A09_54	-1.68284
A09_55	-1.25828
A09_56	-1.04578
A09_57	-0.975959
A09_58	-1.09357
A09_59	-2.3296
A09_60	-1.34835
A09_61	0.468988
A09_62	-0.266155
A09_63	0.0266375
A09_64	0.87069
A09_65	-3.03989
A09_66	9.90523
A09_67	-1.19575
A09_68	-1.2481
A09_69	-1.01018
A09_70	-0.952523
A09_71	1.78059
A09_72	1.5234
A09_73	-1.62006
A09_74	-0.753379
A09_75	-0.909085
A09_76	-0.12206
A09_77	0.84924
A09_78	1.01327
A09_79	-0.0800502
A09_80	0.835075
A09_81	-1.61416
A09_82	-0.647245
A09_83	-0.974786
A09_84	-0.252748
A09_85	-1.96366
A09_86	2.52266
A09_87	0.604833
A09_88	-0.224254
A09_89	-0.275897
A09_90	-1.76285
A09_91	-2.63625
A09_92	3.02834
A09_93	-0.420247
A09_94	1.30486
A09_95	-0.282383
A09_96	0.869574
A10_01	-0.51396
A10_02	-1.74001
A10_03	-1.34858
A10_04	-0.0643557
A10_05	-1.143
A10_06	3.7157
A10_07	-0.0443914
A10_08	-1.56515
A10_09	-0.820535
A10_10	-0.812195
A10_11	-0.785431
A10_12	-1.49873
A10_13	-0.442791
A10_14	-1.47774
A10_15	1.66889
A10_16	2.14385
A10_17	-0.0970849
A10_18	0.386908
A10_19	0.622806
A10_20	-0.871875
A10_21	2.72518
A10_22	-0.338042
A10_23	-0.0972502
A10_24	-0.755607
A10_25	1.00332
A10_26	1.00023
A10_27	-0.341381
A10_28	1.26065
A10_29	1.03056
A10_30	1.17813
A10_31	-0.27052
A10_32	-1.42037
A10_33	-1.02774
A10_34	-1.172
A10_35	-0.903257
A10_36	0.692046
A10_37	-1.55694
A10_38	-1.32574
A10_39	0.542622
A10_40	0.183657
A10_41	0.292218
A10_42	-1.38102
A10_43	1.49318
A10_44	-0.400186
A10_45	0.640181
A10_46	-0.451681
A10_47	-0.684416
A10_48	1.54028
A10_49	0.222659
A10_50	-1.18042
A10_51	-1.02336
A10_52	-0.345284
A10_53	-0.641616
A10_54	-1.41669
A10_55	-2.00419
A10_56	-1.35607
A10_57	-1.58789
A10_59	-0.672356
A10_60	-0.629356
A10_61	-1.61354
A10_64	-0.208003
A10_65	-1.55336
A10_66	-1.82604
A10_67	1.21869
A10_68	0.65041
A10_69	0.793142
A10_70	6.52031
A10_72	4.64973
A10_73	-0.537122
A10_74	0.850472
A10_75	-0.841218
A10_76	-0.697411
A10_77	0.658875
A10_78	1.54354
A10_79	-1.29435
A10_80	-0.948231
A10_81	-0.112956
A10_82	1.17268
A10_83	4.53497
A10_84	-1.17783
A10_85	-0.89285
A10_86	-0.874622
A10_87	-0.489412
A10_88	0.0434292
A10_89	-1.93695
A10_90	-0.804739
A10_91	-0.68101
A10_92	-0.384263
A10_93	-0.519278
A10_95	10.1211
A10_96	-1.49803
A11_01	-0.567426
A11_02	-1.00049
A11_03	0.182905
A11_04	-1.10138
A11_05	-0.763893
A11_06	3.51994
A11_07	0.667488
A11_08	1.17399
A11_09	-0.956016
A11_10	0.560095
A11_11	-0.655942
A11_12	-0.519021
A11_13	1.51269
A11_14	0.0965699
A11_15	0.738977
A11_16	1.98972
A11_17	3.20962
A11_18	1.77766
A11_19	0.392285
A11_20	-0.086441
A11_21	-1.16501
A11_22	-0.605127
A11_23	-0.618389
A11_24	-1.13499
A11_25	-0.389379
A11_26	-0.720845
A11_27	-0.478354
A11_28	5.49242
A11_29	-1.45057
A11_30	-0.576701
A11_31	1.11896
A11_32	-0.281783
A11_33	-0.641931
A11_34	0.200337
A11_35	0.0637919
A11_36	-0.257818
A11_37	0.126759
A11_38	1.10754
A11_39	-0.874808
A11_40	1.5272
A11_41	-0.132212
A11_42	0.141202
A11_43	-0.630137
A11_44	-0.239432
A11_45	-1.17661
A11_46	-0.382701
A11_47	-0.995971
A11_48	-0.596284
A11_49	-0.699197
A11_50	0.807708
A11_51	0.00748522
A11_52	-0.940459
A11_53	-1.25354
A11_54	-0.213637
A11_55	-0.394917
A11_56	-0.360331
A11_57	-0.799805
A11_58	1.96403
A11_59	-1.17139
A11_60	-0.978609
A11_61	-0.204899
A11_62	0.0704609
A11_63	-1.10564
A11_64	-0.496906
A11_65	0.901024
A11_66	-0.217148
A11_67	-0.980256
A11_68	0.430139
A11_69	0.640483
A11_70	-0.894982
A11_71	-1.03141
A11_72	-1.12766
A11_73	2.02724
A11_74	0.640887
A11_75	-1.54981
A11_76	0.0900783
A11_77	-0.316657
A11_78	-0.661986
A11_79	-1.40703
A11_80	0.323815
A11_81	2.18072
A11_82	2.03606
A11_83	-1.19321
A11_84	2.23749
A11_85	-0.494081
A11_86	-1.59615
A11_87	-0.996354
A11_88	0.148646
A11_89	4.81638
A11_90	-2.03502
A11_91	-0.482165
A11_92	-1.20111
A11_93	-0.822913
A11_94	0.766425
A11_95	-0.315859
A11_96	-0.746445
